## Meta-analyses identify differentially expressed microRNAs in Parkinson's disease

Jessica Schulz<sup>1,§</sup>, Petros Takousis<sup>2,§</sup>, Inken Wohlers<sup>3</sup>, Ivie O G Itua<sup>2</sup>, Valerija Dobricic<sup>3</sup>, Harald Binder<sup>4</sup>, Lefkos Middleton<sup>2</sup>, John P A Ioannidis<sup>5</sup>, Robert Perneczky<sup>2,6,7,8</sup>, Lars Bertram<sup>2,3</sup>, Christina M Lill<sup>1,\*</sup>

<sup>1</sup>Genetic and Molecular Epidemiology Group, Institute of Neurogenetics, University of Lübeck, Lübeck, Germany

<sup>2</sup>Neuroepidemiology and Ageing Research Unit, School of Public Health, Imperial College, London, UK

<sup>3</sup>Lübeck Interdisciplinary Platform for Genome Analytics (LIGA), Institutes of Neurogenetics & Integrative and Experimental Genomics, University of Lübeck, Lübeck, Germany

<sup>4</sup>Institute for Medical Biometry and Statistics, Faculty of Medicine and Medical Center - University of Freiburg, Germany

<sup>5</sup>Departments of Medicine, Health Research and Policy, and Statistics, Biomedical Data Science, and Statistics, and Meta-Research Innovation Center at Stanford (METRICS), Stanford University, Stanford, California, CA 94305, USA

<sup>6</sup>Department of Psychiatry and Psychotherapy, Ludwig-Maximilians-Universität München, Germany

<sup>7</sup>German Center for Neurodegenerative Diseases (DZNE) Munich, Munich, Germany

<sup>8</sup>West London Mental Health NHS Trust, London, UK

§ joint first authors

\* Correspondence to: Christina M. Lill, MD, MSc, Genetic and Molecular Epidemiology Group, Institute of Neurogenetics, University of Lübeck, Maria-Goeppert-Str. 1, 23562 Lübeck, Germany, e-mail: [christina.lill@uni-luebeck.de](mailto:christina.lill@uni-luebeck.de).

Title: 80 characters (incl. spaces)

Running head: 29 characters (incl. spaces)

Abstract: 250 words

Introduction: 470 words

Discussion: 1498 words

body of the manuscript (not including abstract or references, figure legends, etc.): 4500 words

number of figures, color figures, and tables: 2 figures, 2 tables

## ABSTRACT

**Objective:** MicroRNA-mediated (dys)regulation of gene expression has been implicated in many disorders including Parkinson's disease (PD). However, results of microRNA expression studies in PD have been inconclusive. The aim of this study was to identify microRNAs that show consistent differential expression across all published expression studies in PD.

**Methods:** We performed a systematic literature search on microRNA expression studies in PD and extracted data from all eligible publications. After stratification for tissue type we performed meta-analyses across microRNAs assessed in three or more independent datasets.

**Results:** Our literature search screened 459 publications and identified 34 datasets eligible for meta-analysis. On these, we performed 149 meta-analyses on microRNAs quantified in brain (n=124), blood (n=21), or cerebrospinal fluid (CSF) samples (n=4). We identified 15 significantly (Bonferroni-adjusted  $\alpha=3.36 \times 10^{-4}$ ) differentially expressed microRNAs in brain (n=4) and blood (n=11). Significant findings in brain were observed with hsa-miR-132-3p ( $p=6.37 \times 10^{-5}$ ), hsa-miR-497-5p ( $p=1.35 \times 10^{-4}$ ), hsa-miR-628-5p ( $p=1.67 \times 10^{-4}$ ), and hsa-miR-133b ( $p=1.90 \times 10^{-4}$ ). The most significant results in blood were observed with hsa-miR-221-3p ( $p=5.02 \times 10^{-19}$ ), hsa-miR-15b-5p ( $p=2.49 \times 10^{-12}$ ), and hsa-miR-185-5p ( $p=4.72 \times 10^{-11}$ ). No significant signals were found in CSF. Analyses of GWAS data for the target genes of differentially expressed brain microRNAs showed significant association ( $\alpha=9.40 \times 10^{-5}$ ) of genetic variants in nine loci.

**Interpretation:** We identified several microRNAs that showed highly significant differential expression in PD blood and brain. Future studies may assess the possible role of the differentially expressed miRNAs in brain in pathogenesis and disease progression as well as the potential of the top blood microRNAs as biomarkers for diagnosis, progression or prediction of PD.

## INTRODUCTION

Parkinson's disease (PD) is the second most common neurodegenerative disease affecting 1% of people over the age of 60. The increasing incidence of PD in industrialized, aging populations constitutes a growing socio-economic burden (1). Idiopathic PD results from a combination of multiple genetic (2–4) and environmental/lifestyle factors (5,6). However, the currently known risk factors only explain a small fraction of the phenotypic variance of PD. Likewise, PD progression and its response to therapy represent multifactorial processes that are only poorly understood (6).

It is likely that epigenetic mechanisms contribute to PD development and progression (6,7). Epigenetics refers to regulatory mechanisms of gene expression that are not mediated by the DNA sequence itself but by chemical or allosteric DNA modifications or by the action of regulatory non-coding RNAs. MicroRNAs (miRNAs) are small non-coding RNAs that serve as posttranscriptional regulators of gene expression. They bind to messenger RNA (mRNA) and decrease their translation (8). In brain, miRNAs appear to play a role in essentially all processes related to neuronal function, including the development of neurodegenerative disorders such as PD (9–11). The prominent role that miRNAs may play for the integrity of the central nervous system is exemplified by experiments inducing a selective depletion of Dicer, the enzyme that cleaves precursor forms of miRNAs (pre-miRNAs) into mature miRNAs. Depletion of this protein in midbrain dopaminergic neurons in mice leads to neurodegeneration and locomotor symptoms mimicking PD (12). However, identifying specific miRNAs playing important roles in PD development and progression remains a challenge. In humans, several studies have reported on differential miRNA expression in PD patients compared to controls, but results have been inconclusive. This is in part due to the fact that sample sizes tend to be comparatively small and that studies often analyze different tissues (Table 1). As a consequence, it has become exceedingly difficult to interpret the often discrepant results.

One way to address this challenge is to assess the cumulative evidence for differential miRNA expression, e.g. by systematic meta-analyses combining all available published expression data in the

*Schulz et al, miRNAs in Parkinson's disease, manuscript*

field. Such approaches demonstrated their value in the context of genetic associations and environmental risk factors in several multifactorial diseases including PD (e.g. ref. (3,5)). For gene expression studies, combining published data by meta-analysis is a particularly challenging task due to the non-standardized fashion that data are reported across publications. The aim of this study was to overcome these difficulties and to identify consistently differentially expressed miRNAs in PD based on published evidence. To this end, we performed a systematic literature search to identify all relevant miRNA expression studies comparing PD cases versus controls and extracted data from all eligible papers using a standardized protocol optimized for the extraction of expression data. Finally, we applied *p*-value based meta-analyses in order to identify miRNAs that are consistently differentially expressed in PD.

## **METHODS**

### **Literature search and eligibility criteria**

The work-flow and data collection procedures applied in this study (Figure 1) are similar to those for genetic association studies developed earlier by our group (3,13), adapted to the characteristics of gene expression studies. A systematic literature search for miRNA expression studies in PD was performed using PubMed (<http://www.pubmed.gov>) applying the search term “(microRNA OR miRNA OR miR\* OR micro-RNA) AND Parkinson\*”. Citations were assessed for eligibility using the title, abstract, or full text, as necessary. Only articles in English and published in peer-reviewed journals (last PubMed search date: July 1<sup>st</sup>, 2017) were considered. Original studies comparing the expression of miRNAs in patients with clinical and/or neuropathological diagnosis of PD and unaffected controls were included. Studies were included irrespective of patient treatment status. MiRNA expression studies on monogenic PD or PD families were excluded. A summary of eligible studies can be found in Table 1.

### **Data extraction**

Details extracted for each eligible study consisted of the first author name, year of publication, and the PubMed identifier, along with key study- and population-specific details such as population and city of origin, number of cases, number of controls, tissue used (i.e., brain, blood, and/or CSF, and a more specific description for each tissue, e.g. substantia nigra, frontal cortex, amygdala, etc., or whole blood, serum, PBMCs, etc.), experimental method(s) used, identifiers of the miRNAs, their expression in tissues of PD patients versus controls (i.e. up- or downregulation or no difference), and corresponding *p*-values. All extracted data were double-checked by an independent member of our group against the original publications.

For quality control, we assessed reported miRNAs for their inclusion in miRBase, v21 (<http://www.mirbase.org>). MiRNA names corresponding to expired entries, non-human miRNAs, or non-miRNA sequences not listed in miRBase were excluded from the analysis. MiRNAs reported in

the included studies were aligned to mature miRNA sequences according to miRBase. The same mature miRNA sequence reported with different miRNA names in different publications (applicable to 9/2059 entries) were subsumed under one common identifier. This concerned miRNAs hsa-miR-199a-3p/hsa-miR-199b-3p, hsa-miR-365a-3p/hsa-miR-365b-3p, hsa-miR-517a-3p/hsa-miR-517b-3p.

### **Data cleaning and reformatting**

Data were analyzed after stratification for tissue categories “brain”, “blood”, and “CSF”. Potential sample overlaps, i.e. investigations of the same miRNA in identical or overlapping datasets in the same tissue (i.e. brain, blood or CSF), for instance in two different publications, were systematically assessed in each stratum. Overlap was determined based on the origin and descriptions of the datasets, overlapping coauthors and/or references to previous studies. In case of sample overlap, only the data entry from the largest dataset was retained for further analysis. In some datasets (n=3), miRNAs were assessed in more than one brain tissue in the same (or largely overlapping) individuals. Here we chose only one brain tissue for inclusion in the meta-analysis. The first selection criterion was sample size, i.e. if the number of analyzed samples was substantially (i.e. at least 30%) larger in one brain tissue versus the other, we retained the larger sample and excluded the other. Otherwise the prioritization on which brain tissue to include was based on the PD Braak staging (14) in order to maximize power (i.e. assuming that brain regions affected earlier in the disease course will show more pronounced effects). That is, the tissue from the region affected earliest in the disease process was selected for inclusion. To assess potential bias introduced by this “prioritization” strategy, we performed sensitivity analyses by including data from “lower priority” regions instead. For the other strata (blood-derived tissue and CSF), only one tissue subtype was assessed per study, thus prioritization was not applicable.

If a study reported several *p*-values for the same miRNA in the same samples based on different experimental or analytical methods (e.g. microarray versus RT-qPCR, different normalization approaches), we re-assessed whether one method was preferential to the other based on the information provided in the publication (e.g. higher accuracy/reliability), and only the most accurate

Schulz et al, miRNAs in Parkinson's disease, manuscript

result was included. If no decision could be reached, we chose a conservative approach and retained the largest  $p$ -value. For  $p$ -values reported with a reference to a predefined significance threshold only (applicable to data from 9/27 publications and a total of 91/2059 data entries), we used the following conservative conversions: " $p \geq 0.05$ " and " $p \geq 0.01$ " were converted to " $p=0.5$ ", " $p < 0.05$ " to " $p=0.025$ ", " $p < 0.01$ " to " $p=0.005$ ", " $p < 0.001$ " to " $p=0.0005$ ", " $p < 0.0001$ " to " $p=0.00005$ ". In one instance, the  $p$ -value in an article appeared as "0.0000"; this was converted to "0.00005".

### Statistical analysis

*Meta-analyses:* Meta-analyses were performed using a customized R script (<https://www.r-project.org>; available upon request) applying a  $p$ -value based approach that takes into account sample size and direction of effect, as described previously for the meta-analysis of genetic association data (15). This method allows to combine results even when effect size estimates and/or standard errors from individual studies are not available or are provided in different units (15). Briefly, the direction of effect and the  $p$ -value observed in each dataset were converted into a signed Z-score. Z-scores for each miRNA were then combined by calculating a weighted sum, with weights being proportional to the square root of the effective sample size for each dataset. Significance was defined using Bonferroni correction for multiple testing. This was based on the overall number of meta-analyses performed across all three tissue strata (i.e.,  $\alpha=0.05/149=3.36 \times 10^{-4}$ ).

*MiRNA target gene analysis:* In order to assess indirectly whether any of the significantly differentially expressed miRNAs in brain may be involved in PD pathogenesis, we tested for a potential enrichment of their target genes in results of the latest genome-wide association study (GWAS) in PD (2,3). To this end, summary statistics from 7,773,234 single-nucleotide polymorphisms (SNPs) were obtained from PDGene (<http://www.pdgene.org>) (3), and analyzed using two different approaches for miRNA target site definition. Firstly, we downloaded human miRNAs and corresponding experimentally validated miRNA targets from MiRTarBase (v. 6.1; <http://mirtarbase.mbc.nctu.edu.tw/>) (16). Secondly, we used brain-specific miRNA-target gene interactions predicted with AGO2 HITS-CLIP miRNA data published by Boudreau et al. (17). To this

Schulz et al, miRNAs in Parkinson's disease, manuscript

end, we mapped Ensembl gene identifiers from the data of Boudreau et al (17) to EntrezGene identifiers based on Ensembl v. 87 (<http://www.ensembl.org>). The corresponding gene sets from MiRTarBase and Boudreau et al. (17) were analyzed with Pascal (18) using 1000 Genomes samples (CEU) for assessment of linkage disequilibrium. Pascal combines SNP-based GWAS summary statistics to gene set scores and tests for enrichment of significant findings using a  $\chi^2$  test and an empirical method.

In addition, we evaluated which top brain miRNAs bind to mRNAs from genes located in the established PD risk loci (2–4) (PD genes assigned for each locus according to Chang et al. (4)) and to the established causal PD genes *LRRK2*, *SNCA*, *VPS35*, *PRKN*, *PINK1*, and *PARK7* (a.k.a. *DJ1*) (6).

Finally, we evaluated whether any individual SNP (apart from the established, i.e. genome-wide significant, risk SNPs) located in the miRNA target genes ( $\pm 10$  kb) was significantly associated with PD in the GWAS data (2,3). Adjustment for multiple testing was performed using Bonferroni correction for the number of tested target genes for all top miRNAs (i.e.,  $\alpha=0.05/532=9.40 \times 10^{-5}$ ).



## RESULTS

### Description of eligible studies

The PubMed search yielded 459 publications, which were screened for eligibility of inclusion. A total of 42 publications were eligible for initial data extraction. After QC, data from 34 independent datasets across 27 publications were subsequently included in the meta-analyses. Reasons for the exclusion of eligible datasets from meta-analysis are summarized in Figure 1 and Table 1.

MiRNA expression data included in the meta-analyses were derived from brain tissue, CSF, and/or blood-derived samples. Ten of the total of 34 datasets included in the meta-analysis were based on brain, 20 datasets on blood-derived samples, and four datasets on CSF. Only one of the included publications tested more than one tissue (blood and CSF (19)). Sampled brain regions of datasets included in the meta-analyses comprised substantia nigra/midbrain (n datasets=5), neocortex (n=4, comprising frontal, prefrontal, temporal, and anterior cingulate cortex), and amygdala (n=1; Table 1). The median number of study participants per dataset was 32 across all studies (interquartile range [IQR] 10-81, range 4-250) irrespective of the tissue analyzed. The median number of individuals was 10 (IQR 8-14, range 4-62) for brain tissue, 71 (IQR 35-113, range 13-250) for blood-derived tissue, and 93.5 (IQR 70-115, range 58-122) for analyses of CSF.

Across all 27 studies included in the analyses presented here, approximately half of the eligible studies (13/27, 48%) stated explicitly that they had performed age and sex matching in their study design. Furthermore, information on the age distribution in cases and controls was provided for 17 datasets, and this distribution was comparable in most instances (average difference in cases and controls across all 17 datasets: 4.7 years, Supplementary Table 1). Three studies indicated statistically significant differences in the age distribution between cases and controls. Similar observations were made for the reporting of sex matching (41% report sex matching, average difference: 7.9%; Supplementary Table 1).

Thirteens of all 27 studies used a targeted ("candidate miRNA") approach to quantify miRNAs using RT-qPCR (n=11 studies), northern blotting (n=1), or a combination of methods (n=1). The remaining 14 studies applied a hypothesis-free ("mirRnome-wide") screening approach using microarrays (n=2), next-generation sequencing (n=6), or TaqMan array micro RNA cards (n=6). The two studies using microarrays as an initial hypothesis-free approach applied targeted quantification methods for the top miRNAs in the same samples for validation.

The median number of miRNAs analyzed per study and included in the meta-analyses presented here was 4 (IQR 1.5-8) ranging from 1 to 123. Only four studies presented data on more than 100 miRNAs (Table 1). Overall, data for a total of 1,002 different miRNAs were reported across all studies, of which 136 had been assessed in at least three independent datasets in at least one tissue stratum and were thus eligible for meta-analysis (Supplementary Table 2). Another 348 miRNAs had been assessed in two studies in at least one tissue stratum, and the remaining 518 had been assessed in only a single study in a single tissue stratum. Ten of the 136 miRNAs were meta-analyzed in both brain and blood strata, one miRNA was meta-analyzed in brain and CSF, and one miRNA in all three tissues, overall resulting in 149 individual meta-analyses (Supplementary Table 2).

### **Meta-analysis results**

One hundred twenty four meta-analyses were based on data collected in brain tissue, 21 in blood-derived tissue, and four in CSF samples. The median number of datasets included per meta-analysis across all miRNAs in brain, blood, and CSF was 3 (max. 4), 4 (max. 9), and 3 (max. 4), respectively. The median combined sample size across all miRNAs in brain, blood, and CSF was 88 (IQR 87-98), 476 (IQR 230-596), and 309 (IQR 309-323.5), respectively. On average, approximately equal numbers of cases and controls were included in each meta-analysis (Supplementary Table 2).

Four of the 124 miRNAs meta-analyzed in brain showed study-wide significant ( $\alpha=3.36\times 10^{-4}$ ) differential expression in PD cases versus controls. Two miRNAs were up-regulated (hsa-miR-497-5p,  $p=1.35\times 10^{-4}$ , hsa-miR-628-5p,  $p=1.67\times 10^{-4}$ ), while two (hsa-miR-132-3p,  $p=6.37\times 10^{-5}$ , hsa-miR-133b,

$p=1.90 \times 10^{-4}$ ) were downregulated in PD cases compared to controls (Table 2). In addition, 34 brain miRNAs showed nominally significant ( $\alpha=0.05$ ) differential expression (Supplementary Table 2); however, these results did not survive multiple testing correction ( $\alpha=3.36 \times 10^{-4}$ ). Sensitivity analyses on the prioritization of multiple brain areas analyzed in the same samples showed that meta-analysis results were sufficiently robust regarding our prioritization procedure (Supplementary Table 3).

Eleven out of 21 meta-analyzed miRNAs from blood-derived tissues showed study-wide significant ( $\alpha=3.36 \times 10^{-4}$ ) differential expression in PD cases versus controls with  $p$ -values ranging from  $5.02 \times 10^{-19}$  to  $1.02 \times 10^{-5}$ . All eleven miRNAs were down-regulated in PD cases compared to controls (Table 2). The miRNA with the most statistically significant differential expression in blood was hsa-miR-221-3p ( $p=5.02 \times 10^{-19}$ ). Four additional miRNAs showed nominally significant ( $\alpha=0.05$ ) differential expression (Supplementary Table 2), but did not survive multiple testing ( $\alpha=3.36 \times 10^{-4}$ ).

Of the four miRNAs meta-analyzed in CSF, none yielded significant results for differential expression in PD versus control individuals (Supplementary Table 2).

Interestingly, miRNAs hsa-miR-19b-3p, hsa-miR-185-5p, and hsa-miR-29a-3p showed at least nominally significant expression differences in both brain and blood. Hsa-miR-19b-3p and hsa-miR-185-5p were down-regulated in both brain ( $p=7.29 \times 10^{-4}$  and  $p=0.0034$ , respectively) and blood ( $p=1.35 \times 10^{-10}$  and  $p=4.72 \times 10^{-11}$ , respectively) in PD versus controls. Hsa-miR-29a-3p was up-regulated in brain ( $p=0.0322$ ) and down-regulated in blood ( $p=2.66 \times 10^{-7}$ ; Supplementary Table 2).

### **Target gene analysis of top differentially expressed brain miRNAs**

Based on published functional data available in miRTarBase (16) and on brain-specific HITS-CLIP data (17), three of the four top brain miRNAs were found to target mRNAs from genes located in established PD risk loci or from causal PD genes. For instance, based on the available brain HITS-CLIP data, hsa-miR132-3p binds to the mRNAs of *SNCA* and of *SCN3A*, and hsa-miR-497-5p binds to the mRNA of *CCNT2* (Supplementary Figure 1, Supplementary Table 4).

Considering all sets of genes targeted by any of the top four brain miRNAs, no set of targets showed significant enrichment ( $\alpha=0.05$ ) for genetic association with PD from GWAS data (Supplementary Table 5). However, the GWAS results of genetic variants mapping in target genes of the top brain miRNAs (after exclusion of the established risk loci already evaluated above) revealed nine additional loci that showed significant association with PD ( $\alpha=9.40 \times 10^{-5}$ , Bonferroni-adjusted for the number of evaluated target genes [ $n=532$ ], Supplementary Table 6).

### **Comparison of miRNAs featured in original publications versus meta-analysis results**

Across all eligible studies a total of 62 different miRNAs were “featured” in the original publications, i.e. they were prominently highlighted as showing differential expression in PD patients versus controls in the abstract of the respective publication. Only 8 (~13%; hsa-miR-1-3p, hsa-miR-29c-3p, hsa-miR-30b-5p, hsa-miR-34b-3p, hsa-miR-133b, hsa-miR-195-5p, hsa-miR-205-5p, hsa-miR-214-3p) of these were featured in two studies, and 4 (~6%; hsa-miR-19b-3p, hsa-miR-24-3p, hsa-miR-29a-3p, hsa-miR-221-3p) in more than two studies. More than half of these featured miRNAs (35/62, 56%) were meta-analyzed in our study. Of note, twelve of these 35 miRNAs (~34%), indeed, showed study-wide significant association ( $\alpha=3.36 \times 10^{-4}$ ) in our meta-analyses, whilst an additional eight (~23%) showed nominally significant association ( $\alpha=0.05$ ). In contrast, nearly half (i.e. 15 of 35 miRNAs (43%)) that had been prominently highlighted in at least one publication did not show any significant results in our meta-analyses. In addition, and perhaps more importantly, miRNAs miR-497-5p and miR-628-5p, showing study-wide significant results in our brain-stratified meta-analyses, and hsa-miR-451a, showing study-wide significance in the blood-stratified meta-analyses, were not featured in any of the original studies.

### **Comparison of original versus replication evidence**

To further assess the reproducibility of significant miRNA expression results, we compared all at least nominally significant  $p$ -values from the original study with results from independent replication data only (replication data were combined by meta-analysis, where applicable; Figure 2). For 29 (19%) of

*Schulz et al, miRNAs in Parkinson's disease, manuscript*

all 149 meta-analyses, nominally significant (two-sided  $\alpha=0.05$ ) differential miRNA expression was recorded by us for the first study. Less than half of these results ( $n=12$ , 41%) were replicated with at least nominal significance (one-sided  $\alpha=0.05$ ) when all available independent replication data were combined, and nine of these 12 results that replicated also yielded study-wide significance (two-sided  $\alpha=3.36 \times 10^{-4}$ ) upon meta-analysis of *all* data (i.e., combining original and replication data). Interestingly, the failure of replication of original results was predominately observed in CSF and brain while most blood-based findings showed good evidence for replication (Figure 2).

## DISCUSSION

Following a systematic literature search and data extraction, we analyzed data from all hitherto published eligible miRNA expression studies in PD patients versus controls. We identified 15 miRNAs that were significantly differentially expressed in brain or blood across at least three independent studies. Interestingly, some of the top brain miRNAs target mRNAs of genes that are central in PD pathophysiology. The most compelling finding relates to miRNA hsa-miR132-3p binding to the mRNA of *SNCA*. To the best of our knowledge, our study represents the first quantitative assessment of published miRNA expression data in PD. Furthermore, we are not aware of any other neurodegenerative research field having applied a comparable approach to collate published miRNA expression results. Therefore, our study not only provides unique insights into the current knowledge of miRNA expression differences in PD but may also be taken as a model for performing equivalent analyses in other neurodegenerative diseases.

One of the strengths of this study is the increase in sample size (and thus power) by combining all eligible data into one statistical test. As outlined above, sample sizes of individual miRNA studies are often small, especially in studies of brain tissue. By meta-analysis, we were able to increase the sample size substantially. In addition, errors occurring only in a single dataset will have a less pronounced impact on the resulting test statistic. Still, most of our brain-stratified meta-analyses (median  $n=88$ ) are underpowered to detect only modest changes in miRNA expression. At the same time, significant results need to be considered with caution. Thus, a substantial increase in sample size should be one of the major objectives in future miRNA expression studies focusing on brain tissue.

Our study shows that the majority of miRNAs featured in the original publications or showing significant results in the first study cannot be replicated in independent investigations and do not have statistical support for differential expression in our meta-analyses. Along these lines, qualitative reviews on the role of miRNAs in PD are largely based on a (subjective) selection of the literature that does not hold up to systematic meta-analyses. For instance, in five recent articles reviewing the role

of miRNAs in PD based on human expression or on experimental data (7,20–23) (including one systematic review (23)), 190 miRNAs were highlighted as being potentially relevant in PD (Supplementary Table 7). Of these, expression data were lacking or sparse for 117 (62%), i.e. they could not be meta-analyzed here. Among the remaining 73 miRNAs highlighted by at least one review, only 13 (7% of the 190 miRNAs) showed evidence for differential expression in PD in our meta-analyses. Furthermore, two of our top miRNAs (hsa-miR-497-5p and hsa-miR-628-5p) were not mentioned in any of the five reviews. These observations highlight the need for independent replication and validation of proposed miRNAs as well as for regular quantitative – rather than merely qualitative – assessments of the available evidence in the literature.

Most of our significant results were based on blood expression data. While these results will likely not reveal novel insights into PD's pathophysiology, these miRNAs may still have the potential to serve as “classification markers” for (prevalent) PD. It should also be noted that gene expression is not only tissue-specific but also variable over time. Thus, differential expression of miRNAs does not allow to draw conclusions on cause-effect relationships in PD. This is true for both blood and brain and for any investigation examining (prevalent) PD patients. In this context it is noteworthy that all eleven miRNAs in the blood-based results appear to be “downregulated” in PD cases as compared to controls. This may reflect changes in gene expression and/or cell compositions as a result of disease progression or maybe most likely treatment effects. Further, in the brain-derived results, especially those from substantia nigra, it is also possible that expression differences might only reflect changes of cellular composition in the diseased tissue. As most studies normalize the results using general house-keeping genes, such effects will not necessarily be removed entirely. An alternative way to quantify miRNA expression would be to perform single-cell experiments in cells of interest, e.g. dopaminergic neurons. However, while a meta-analysis has recently been published for mRNA-based transcriptomics studies applying laser capturing for single cell analysis in the substantia nigra (24), equivalent data on miRNAs are currently too sparse.

Furthermore, most publications do not provide any information on disease duration, severity, and treatment of patients, and, for brain tissue, neuropathological progression markers. Thus, the impact of these factors on the respective miRNA results is impossible to assess adequately. In addition, a study design that does not consider age and/or sex matching for cases and controls may produce biased gene expression results. As described in the results section, the majority of datasets had comparable age and sex distributions in cases and controls. Notwithstanding we cannot exclude that missing age and/or sex matching has had an impact on some of our meta-analysis results.

In this study, we applied systematic  $p$ -value based meta-analyses to collate the available published data. While this is an established method often applied in the GWAS field (15), an effect-size based meta-analysis would not only provide additional information such as the estimated magnitude of gene expression differences, but also allow quantification of the heterogeneity of estimated differences, and to perform additional analyses such as testing for small-study effects, which can be indicative of publication or selective reporting bias (25). The reason for the choice of the  $p$ -value based method was the lack of detailed and standardized reports of miRNA expression differences across publications. Specifically, one third of the studies included in the meta-analyses did not provide precise effect estimates and/or variances. As we were not able to quantitatively assess in-between study heterogeneity, we assessed the consistency of the effect directions of the individual datasets for study-wide significant miRNAs. Overall, the direction of differential expression across datasets was consistent. The only “outlying” datasets in the meta-analyses of hsa-miR-628-5p, hsa-miR-15b-5p, and hsa-miR-181a-5p have either a large  $p$ -value and/or tested a small number of samples explaining their modest impact on the meta-analysis result. Even more importantly, a proportion of publications (applicable to data from 9/27 publications and a total of 91/2059 data entries) did not report full  $p$ -values but reported them as “less than” or “greater than” a certain significance level. Here, we chose a conservative approach for including such data in our analyses (see methods section). Furthermore, the quality of our analyses can, at best, only mirror the quality of the underlying publications from which data were extracted. We performed a range of quality



control checks to detect inconsistencies within studies, but cannot exclude that all errors were detected by this procedure. However, we do not expect any *systematic* error arising from errors and mistakes that may have remained undetected in the original publications. Nevertheless, these observations clearly highlight the need for a standardized and more transparent reporting of applied methodology, statistics and results in miRNA expression studies (26).

One additional limitation in combining data from the published domain is the potential presence of publication bias and/or selective reporting bias. Due to the lack of consistently reported effect size estimates in a part of eligible publications (see above), we were not able to assess potential hints for this bias quantitatively (e.g. by regression analyses (27)). To address this concern, we evaluated each publication for evidence that only a subset of the generated expression results were reported in detail (Supplementary Table 8). For two thirds of all publications (i.e., 18/27, 67%) we did not find evidence for selective reporting of expression results. Nine publications each of which tested more than >70 miRNAs in a single experiment had generated more data than provided in the publication. Only two of these studies provided the identifiers of the miRNAs for which detailed results were not provided. This list contained two of the eleven miRNAs differentially expressed in blood according to our meta-analyses (hsa-miR-185-5p, hsa-miR-181a-5p). Meta-analyses in other fields (e.g. cancer) of miRNA and other regulatory RNA associations have pointed out the surprisingly high proportion of reported statistically significant results, which may be an indication of excess significance due to selective reporting (28,29). This pattern was not as prominent in the studies that we analyzed, where 13 of the identified studies (Table 1) did not feature any particular miRNAs eventually. Nevertheless, we cannot exclude that selective reporting has inflated some of our meta-analysis results. Especially the blood-based meta-analysis results of hsa-miR-185-5p and hsa-miR-181a-5p need to be considered with caution and warrant independent replication.

In conclusion, by systematically combining data from all eligible miRNA expression studies published to date, we identified 15 miRNAs that were differentially expressed in PD patients and controls in brain or blood. Future studies will need to increase the sample size for miRNA-based studies on brain

*Schulz et al, miRNAs in Parkinson's disease, manuscript*

tissue. Our study is the first to compile published miRNA expression data in the field of neurodegenerative diseases in a systematic and standardized way. Thus, it may serve as a model for combining these data in other related fields.

## **ACKNOWLEDGMENTS**

We thank Lukas Duchrow and Colin Schulz for excellent assistance in the bioinformatic analyses. We also thank Fabian Kilpert for help with the figures. C.M.L. and L.B. received funding from the German Research Foundation (DFG; FOR2488/1: GZ LI 2654/2-1 and BE 2287/5-1), the Possehl Foundation, the Renate Maaß Foundation, and the University of Luebeck (section of medicine, J21-2016). J.S. was supported by the MD thesis research scholarship “Exzellenzmedizin” of the University of Luebeck. I.W. was supported by the Peter and Traudl Engelhorn Foundation.

## **AUTHOR CONTRIBUTIONS**

Study design: J.S., P.T., R.P., L.B., C.M.L., literature search and data extraction: J.S., P.T., I.O.G.I., V.D., statistical analyses/advice: J.S., I.W., H.B., J.P.I., C.M.L, writing of the manuscript: J.S., P.T., C.M.L., critical revision of the manuscript: all co-authors

## **POTENTIAL CONFLICTS OF INTEREST**

None of the authors reports any conflicts of interest.

## REFERENCES

1. Dorsey ER, Constantinescu R, Thompson JP, Biglan KM, Holloway RG, Kieburtz K, et al. Projected number of people with Parkinson disease in the most populous nations, 2005 through 2030. *Neurology*. 2007 Jan 30;68(5):384–6.
2. Nalls MA, Pankratz N, Lill CM, Do CB, Hernandez DG, Saad M, et al. Large-scale meta-analysis of genome-wide association data identifies six new risk loci for Parkinson's disease. *Nat Genet*. 2014 Sep;46(9):989–93.
3. Lill CM, Roehr JT, McQueen MB, Kavvoura FK, Bagade S, Schjeide B-MM, et al. Comprehensive research synopsis and systematic meta-analyses in Parkinson's disease genetics: The PDGene database. *PLoS Genet*. 2012;8(3):e1002548.
4. Chang D, Nalls MA, Hallgrímsdóttir IB, Hunkapiller J, van der Brug M, Cai F, et al. A meta-analysis of genome-wide association studies identifies 17 new Parkinson's disease risk loci. *Nat Genet*. 2017 Sep 11;
5. Noyce AJ, Bestwick JP, Silveira-Moriyama L, Hawkes CH, Giovannoni G, Lees AJ, et al. Meta-analysis of early nonmotor features and risk factors for Parkinson disease. *Ann Neurol*. 2012 Dec;72(6):893–901.
6. Lill CM. Genetics of Parkinson's disease. *Mol Cell Probes*. 2016 Dec;30(6):386–96.
7. Labbé C, Lorenzo-Betancor O, Ross OA. Epigenetic regulation in Parkinson's disease. *Acta Neuropathol*. 2016 Oct;132(4):515–30.
8. Esteller M. Non-coding RNAs in human disease. *Nat Rev Genet*. 2011 Nov 18;12(12):861–74.
9. Salta E, De Strooper B. Non-coding RNAs with essential roles in neurodegenerative disorders. *Lancet Neurol*. 2012 Feb;11(2):189–200.
10. Qureshi IA, Mehler MF. Non-coding RNA networks underlying cognitive disorders across the lifespan. *Trends Mol Med*. 2011 Jun;17(6):337–46.
11. Mehler MF, Mattick JS. Noncoding RNAs and RNA editing in brain development, functional diversification, and neurological disease. *Physiol Rev*. 2007 Jul;87(3):799–823.
12. Kim J, Inoue K, Ishii J, Vanti WB, Voronov SV, Murchison E, et al. A MicroRNA feedback circuit in midbrain dopamine neurons. *Science*. 2007 Aug 31;317(5842):1220–4.
13. Bertram L, McQueen MB, Mullin K, Blacker D, Tanzi RE. Systematic meta-analyses of Alzheimer disease genetic association studies: the AlzGene database. *Nat Genet*. 2007 Jan;39(1):17–23.
14. Braak H, Del Tredici K, Rüb U, de Vos RAJ, Jansen Steur ENH, Braak E. Staging of brain pathology related to sporadic Parkinson's disease. *Neurobiol Aging*. 2003 Apr;24(2):197–211.
15. Willer CJ, Li Y, Abecasis GR. METAL: fast and efficient meta-analysis of genomewide association scans. *Bioinformatics*. 2010 Sep 1;26(17):2190–1.
16. Chou C-H, Chang N-W, Shrestha S, Hsu S-D, Lin Y-L, Lee W-H, et al. miRTarBase 2016: updates to the experimentally validated miRNA-target interactions database. *Nucleic Acids Res*. 2016 Jan 4;44(D1):D239–247.
17. Boudreau RL, Jiang P, Gilmore BL, Spengler RM, Tirabassi R, Nelson JA, et al. Transcriptome-wide discovery of microRNA binding sites in human brain. *Neuron*. 2014 Jan 22;81(2):294–305.
18. Lamparter D, Marbach D, Rueedi R, Kutalik Z, Bergmann S. Fast and Rigorous Computation of Gene and Pathway Scores from SNP-Based Summary Statistics. *PLoS Comput Biol*. 2016 Jan;12(1):e1004714.
19. Burgos K, Malenica I, Metpally R, Courtright A, Rakela B, Beach T, et al. Profiles of extracellular miRNA in cerebrospinal fluid and serum from patients with Alzheimer's and Parkinson's diseases correlate with disease status and features of pathology. *PLoS ONE*. 2014;9(5):e94839.
20. da Silva FC, Iop R da R, Vietta GG, Kair DA, Gutierrez Filho PJB, de Alvarenga JGS, et al. microRNAs involved in Parkinson's disease: A systematic review. *Mol Med Rep*. 2016 Nov;14(5):4015–22.
21. Mushtaq G, Greig NH, Anwar F, Zamzami MA, Choudhry H, Shaik MM, et al. miRNAs as Circulating Biomarkers for Alzheimer's Disease and Parkinson's Disease. *Med Chem*. 2016;12(3):217–25.
22. Majidinia M, Mihanfar A, Rahbarghazi R, Nourazarian A, Bagca B, Avci ÇB. The roles of non-coding RNAs in Parkinson's disease. *Mol Biol Rep*. 2016 Nov;43(11):1193–204.
23. Singh A, Sen D. MicroRNAs in Parkinson's disease. *Exp Brain Res*. 2017 Aug;235(8):2359–74.
24. Kim YJ, Jeon J, Shin J, Kim NY, Hong JH, Oh J-M, et al. Dysregulation of the causative genes for hereditary parkinsonism in the midbrain in Parkinson's disease. *Mov Disord*. 2017 May 26;
25. Sterne JA, Gavaghan D, Egger M. Publication and related bias in meta-analysis: power of statistical tests and prevalence in the literature. *J Clin Epidemiol*. 2000 Nov;53(11):1119–29.
26. Nair VS, Pritchard CC, Tewari M, Ioannidis JPA. Design and Analysis for Studying microRNAs in Human Disease: A Primer on -Omic Technologies. *Am J Epidemiol*. 2014 Jul 15;180(2):140–52.
27. Harbord RM, Egger M, Sterne JAC. A modified test for small-study effects in meta-analyses of controlled trials with binary endpoints. *Stat Med*. 2006 Oct 30;25(20):3443–57.
28. Nair VS, Maeda LS, Ioannidis JPA. Clinical outcome prediction by microRNAs in human cancer: a systematic review. *J Natl Cancer Inst*. 2012 Apr 4;104(7):528–40.
29. Serghiou S, Kyriakopoulou A, Ioannidis JPA. Long noncoding RNAs as novel predictors of survival in human cancer: a systematic review and meta-analysis. *Mol Cancer*. 2016 28;15(1):50.
30. Wake C, Labadorf A, Dumitriu A, Hoss AG, Bregu J, Albrecht KH, et al. Novel microRNA discovery using small RNA sequencing in post-mortem human brain. *BMC Genomics*. 2016 Oct 4;17(1):776.

## Legends to figures

### Figure 1. Flowchart of literature search, data extraction, and analysis of miRNA expression data

**Figure 2. Comparisons of original and replication  $p$ -values.** This figure displays all at least nominally significant two-sided  $p$ -values of the respective original studies (data from independent datasets derived from the original study were combined by meta-analysis where applicable), and the corresponding (one-sided)  $p$ -value from all replication data only (combined by meta-analysis where applicable). Note that  $p$ -values from all other meta-analyses in this paper are two-sided; a one-sided  $p$ -value was chosen here to take into account the directions of effect in the replication data. Corresponding  $p$ -values of original and replication data are connected by a line (yellow line = brain-stratified results, red line = blood-stratified results, blue line = cerebrospinal fluid-stratified results). The y axis shows the negative log of the  $p$ -value, i.e. larger values indicate more significant results. The horizontal black line corresponds to a  $p$ -value of 0.05.

## Tables

**Table 1.** Overview of published microRNA expression studies in Parkinson's disease patients and controls

| Study                | Population | N cases | N controls | Tissue | Sub tissue                                                           | N miRNAs /study | N miRNAs meta-analyzed | Featured miRNAs                                |
|----------------------|------------|---------|------------|--------|----------------------------------------------------------------------|-----------------|------------------------|------------------------------------------------|
| Kim, 2007            | USA        | 3       | 3          | brain  | midbrain (cerebral cortex, cerebellum) <sup>1</sup>                  | 1               | 1                      | miR-133b                                       |
| Sethi, 2009          | USA        | 4       | 6          | brain  | temporal cortex                                                      | 4               | 4                      | -                                              |
| Margis, 2011         | Brazil     | 8       | 8          | blood  | whole blood                                                          | 6               | 3                      | miR-1-3p, miR-22-3p, miR-29a-3p                |
| Minones-Moyano, 2011 | Spain      | 14      | 21         | brain  | frontal cortex (substantia nigra, amygdala, cerebellum) <sup>2</sup> | 2               | 2                      | miR-34c-5p, miR-34b-3p                         |
| Martins, 2011        | Portugal   | 19      | 13         | blood  | PBMCs                                                                | 21              | 5                      | -                                              |
| Cho, 2013            | USA        | 15      | 11         | brain  | frontal cortex (striatum) <sup>2</sup>                               | 1               | n.a. <sup>3</sup>      | miR-205-5p                                     |
| Alvarez-Erviti, 2013 | Spain      | 6       | 5          | brain  | substantia nigra (amygdala) <sup>1</sup>                             | 7               | 4                      | -                                              |
| Cardo, 2013          | Spain      | 31      | 25         | blood  | plasma                                                               | 1               | n.a. <sup>4</sup>      | miR-331-5p                                     |
| Soreq, 2013          | Israel     | 7       | 6          | blood  | serum                                                                | 15              | 2                      | -                                              |
| Khoo, 2012           | Germany    | 42      | 30         | blood  | plasma                                                               | 3               | n.a. <sup>4</sup>      | miR-450b-3p, miR-626, miR-505-3p, miR-1826     |
| Kim, 2014            | USA        | 8       | 8          | brain  | substantia nigra - DA neurons                                        | 1               | n.a. <sup>3</sup>      | miR-126-3p                                     |
| Botta-Orfila, 2014   | Spain      | 10      | 10         | blood  | serum                                                                | 14              | 9                      | miR-29a-3p, miR-29c-3p, miR-19a-3p, miR-19b-3p |
|                      | Spain      | 20      | 20         | blood  | serum                                                                | 14              | 9                      |                                                |
|                      | Spain      | 65      | 65         | blood  | serum                                                                | 4               | 4                      |                                                |
| Schlaudraff, 2014    | Germany    | 5       | 8          | brain  | midbrain (DA neurons)                                                | 1               | 1                      | -                                              |
| Burgos, 2014         | USA        | 57      | 65         | CSF    | CSF                                                                  | 16              | 4                      | -                                              |
|                      | USA        | 50      | 62         | blood  | serum                                                                | 5               | 1                      |                                                |
| Villar-Menéndez,     | Spain      | 6       | 7          | brain  | striatum                                                             | 1               | n.a. <sup>3</sup>      | miR-34b-3p                                     |

| 2014                     |        |     |     |       |                               |     |                     |                                                                        |
|--------------------------|--------|-----|-----|-------|-------------------------------|-----|---------------------|------------------------------------------------------------------------|
| Vallelunga, 2014         | Italy  | 31  | 30  | blood | serum                         | 8   | 2                   | miR-339-5p, miR-223-5p, miR-324-3p, miR-24-3p, miR-30c-5p, miR-148b-3p |
| Zhao, 2014               | China  | 46  | 46  | blood | serum                         | 1   | n.a. <sup>4</sup>   | miR-133b                                                               |
| Cardo, 2014              | UK     | 8   | 4   | brain | substantia nigra              | 484 | 123                 | miR-198, miR-135b-5p, miR-485-5p, miR-548d-3p                          |
| Serafin, 2014            | Italy  | 38  | 38  | blood | PBMCs                         | 2   | n.a. <sup>3</sup>   | miR-30b-5p, miR-29a-3p                                                 |
| Alieva, 2015             | Russia | 20  | 24  | blood | lymphocytes                   | 5   | n.a. <sup>3,4</sup> | miR-129-5p, miR-7-5p, miR-132-3p, miR-9-5p, miR-9-3p                   |
| Serafin, 2015            | Italy  | 36  | 36  | blood | PBMCs                         | 5   | n.a. <sup>3,4</sup> | miR-103a-3p, miR-30b-5p, miR-29a-3p                                    |
| Fernández-Santiago, 2015 | Spain  | 8   | 28  | blood | serum                         | 3   | 3                   | miR-19b-3p                                                             |
| Briggs, 2015             | USA    | 8   | 8   | brain | substantia nigra - DA neurons | 157 | 1                   | -                                                                      |
| Takahashi, 2015          | Japan  | 30  | 47  | blood | plasma                        | 6   | n.a. <sup>4</sup>   | -                                                                      |
| Gui, 2015                | China  | 47  | 27  | CSF   | n.a.                          | 26  | 4                   | miR-1-3p, miR-19b-3p, miR-153-3p, miR-409-3p, miR-10a-5p, let-7g-3p    |
|                          | China  | 78  | 35  | CSF   | n.a.                          | 8   | 4                   |                                                                        |
| Pantano, 2015            | Spain  | 7   | 7   | brain | amygdala                      | 125 | 98                  | -                                                                      |
| Dong, 2016               | China  | 30  | 30  | blood | serum                         | 12  | 4                   | miR-141-3p, miR-214-3p, miR-146b-5p, miR-193a-3p                       |
|                          | China  | 92  | 74  | blood | serum                         | 4   | 3                   |                                                                        |
| Ding, 2016               | China  | 45  | 36  | blood | serum                         | 15  | 7                   | miR-195-5p, miR-185-5p, miR-15b-5p, miR-221-3p, miR-181a-5p            |
|                          | China  | 61  | 55  | blood | serum                         | 5   | 5                   |                                                                        |
| Hoss, 2016               | USA    | 29  | 33  | brain | frontal cortex                | 892 | 122                 | miR-10b-5p                                                             |
| Yilmaz, 2016             | Turkey | 102 | 102 | blood | whole blood                   | 5   | n.a. <sup>4</sup>   | miR-335-3p, miR-561-3p, miR-579-3p                                     |
| Nair, 2016               | USA    | 12  | 12  | brain | striatum                      | 13  | n.a. <sup>3,4</sup> | -                                                                      |
| Chen, 2016               | China  | 24  | 61  | blood | PBMCs                         | 4   | 1                   | -                                                                      |
| Cosín-Tomás, 2016        | Spain  | 20  | 21  | blood | plasma                        | 4   | 1                   | -                                                                      |

|                     |             |     |     |       |                          |    |                   |                                                           |
|---------------------|-------------|-----|-----|-------|--------------------------|----|-------------------|-----------------------------------------------------------|
| Wake, 2016 (30)     | USA         | 29  | 36  | brain | frontal cortex           | 3  | n.a. <sup>4</sup> | -                                                         |
| Tatura, 2016        | Germany     | 22  | 10  | brain | anterior cingulate gyrus | 41 | 28                | miR-144-3p, miR-199b-5p, miR-221-3p, miR-488-3p, miR-544a |
| Ma, 2016            | China       | 138 | 112 | blood | serum                    | 16 | 12                | miR-29c, miR-146a-5p, miR-214, miR-221                    |
| Marques, 2016       | Netherlands | 28  | 30  | CSF   | n.a.                     | 10 | 1                 | miR-24-3p, miR-205-5p                                     |
| Mo, 2016            | China       | 44  | 42  | CSF   | n.a.                     | 3  | n.a. <sup>4</sup> | miR-144-5p, miR-200a-3p, miR-542-3p                       |
| Li, 2017            | China       | 60  | 60  | blood | plasma                   | 3  | n.a. <sup>4</sup> | miR-137, miR-124-3p                                       |
| Cao, 2017           | China       | 109 | 40  | blood | serum                    | 24 | 12                | miR-19b-3p, miR-195-5p, miR-24-3p                         |
| Fu, 2017            | China       | 15  | 15  | blood | PBMCs                    | 1  | 1                 | miR-21-5p                                                 |
| Schwienbacher, 2017 | Italy       | 50  | 50  | blood | plasma                   | 4  | 3                 | miR-30a-5p                                                |
|                     | Italy       | 49  | 49  | blood | plasma                   | 4  | 3                 |                                                           |
|                     | Italy       | 10  | 10  | blood | plasma                   | 4  | n.a. <sup>3</sup> |                                                           |

Legend. References for the listed studies can be found in the Supplementary Material. N = number, Sub tissue = the tissues provided in brackets represent brain regions that have not been included in the meta-analysis due to tissue prioritization (see superscribed numbers for details and also see methods), N miRNAs reported per study = number of miRNAs for which test statistics, i.e. *p*-values and directions of effect, were provided in the paper, N miRNAs meta-analyzed = number of miRNAs meta-analyzed in our study, featured miRNAs = indicates miRNAs that are highlighted as relevant for Parkinson's disease in the abstract of the respective publication, CSF = cerebrospinal fluid, PBMCs = peripheral blood mononuclear cells, DA neurons = dopaminergic neurons, <sup>1</sup> = tissue prioritization according to Braak, <sup>2</sup> = tissue prioritization based on higher sample size, n.a. = not applicable (miRNA data were not included due to population overlap or other reasons, also see methods). <sup>3</sup> = reason for exclusion of data from meta-analysis was sample overlap, <sup>4</sup> = reason for exclusion of data from meta-analysis was the lack of 3 independent datasets for the miRNAs reported in this study.



**Table 2.** Significant meta-analysis results of differentially expressed miRNAs in brain and blood tissue of Parkinson's disease patients and controls

| Stratum | miRNA           | N total (patients, controls) | N datasets | Dataset-specific expression | Overall expression | P-value  |
|---------|-----------------|------------------------------|------------|-----------------------------|--------------------|----------|
| Brain   | hsa-miR-132-3p  | 84 (41,43)                   | 3          | -, -, -                     | down               | 6.37E-05 |
|         | hsa-miR-497-5p  | 119 (65,54)                  | 4          | +, +, +, +                  | up                 | 1.35E-04 |
|         | hsa-miR-628-5p  | 88 (44,44)                   | 3          | -, +, +                     | up                 | 1.67E-04 |
|         | hsa-miR-133b    | 90 (45,45)                   | 4          | -, -, -, -                  | down               | 1.90E-04 |
| Blood   | hsa-miR-221-3p  | 596 (353,243)                | 4          | -, -, -, -                  | down               | 5.02E-19 |
|         | hsa-miR-15b-5p  | 669 (392,277)                | 6          | +, -, -, +, -, -            | down               | 2.49E-12 |
|         | hsa-miR-185-5p  | 596 (353,243)                | 4          | -, -, -, +                  | down               | 4.72E-11 |
|         | hsa-miR-19b-3p  | 657 (369,288)                | 7          | -, -, -, -, -, -            | down               | 1.35E-10 |
|         | hsa-miR-214-3p  | 476 (260,216)                | 3          | -, -, -                     | down               | 4.92E-10 |
|         | hsa-miR-29c-3p  | 657 (369,288)                | 7          | -, -, -, -, -, +            | down               | 4.28E-09 |
|         | hsa-miR-193a-3p | 476 (260,216)                | 3          | -, -, -                     | down               | 5.07E-09 |
|         | hsa-miR-181a-5p | 656 (383,273)                | 6          | +, -, -, -, -, +            | down               | 1.49E-08 |
|         | hsa-miR-29a-3p  | 839 (457,382)                | 9          | -, -, -, -, -, -, +, -      | down               | 2.66E-07 |
|         | hsa-miR-141-3p  | 476 (260,216)                | 3          | -, -, -                     | down               | 8.06E-07 |
|         | hsa-miR-451a    | 145 (54,91)                  | 3          | -, -, -                     | down               | 1.02E-05 |

**Legend.** N = number, dataset-specific expression = differential expression for the respective miRNA per dataset included in the meta-analysis in Parkinson's disease patients compared to controls (for references see Supplementary Table 2), overall expression = global direction of expression across all meta-analyzed datasets according to the z score resulting from the *p*-value based meta-analysis.

# Systematic literature search

Until July 1<sup>st</sup> 2017: PubMed query "(microRNA OR miRNA OR miR\* OR micro-RNA) AND Parkinson\* [All fields]"; citation retrieval (n=459)

## Inclusion criteria

- Human microRNA expression study in idiopathic PD cases and controls
- peer-reviewed
- published in English
- *p* values and direction of effect available

## Exclusion criteria

- Exclusion of 417 articles
- no human expression study in PD cases and controls (n=403)
- non-English language (n=11)
- missing data (n=3)

## Data extraction

2059 entries, 1002 different microRNAs, 42 publications

B  
R  
A  
I  
N

B  
L  
O  
O  
D

C  
S  
F

## Quality control

- Exclusion of 1571 entries
- less than three independent datasets (n= 1348)
- sample overlap (n=214)
- tissue prioritization (n=9)

## P-value based meta-analyses (n=149)

in brain (n=124), blood (n=21) and CSF (n=4) across 488 entries  
based on 136 different miRNAs in a total of 34 datasets derived from 27 publications

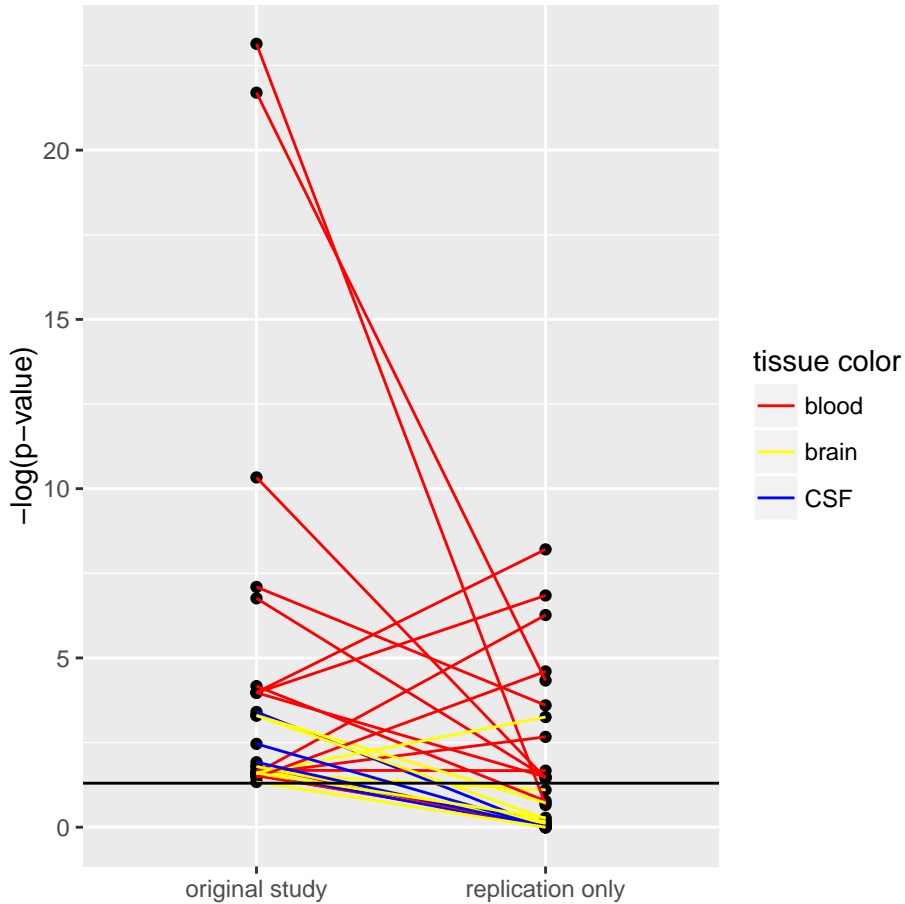

Source: https://www.biorxiv.org/content/10.1101/253849v2.full.pdf
